# Supplementary material
Source: PubMed Central journal article supplement (PMC6287393)
Supplement: 1.jc-13-1811_1fig_1tab.pdf [file 1.jc-13-1811_1fig_1tab.pdf]

**Supplemental Figure 1.**

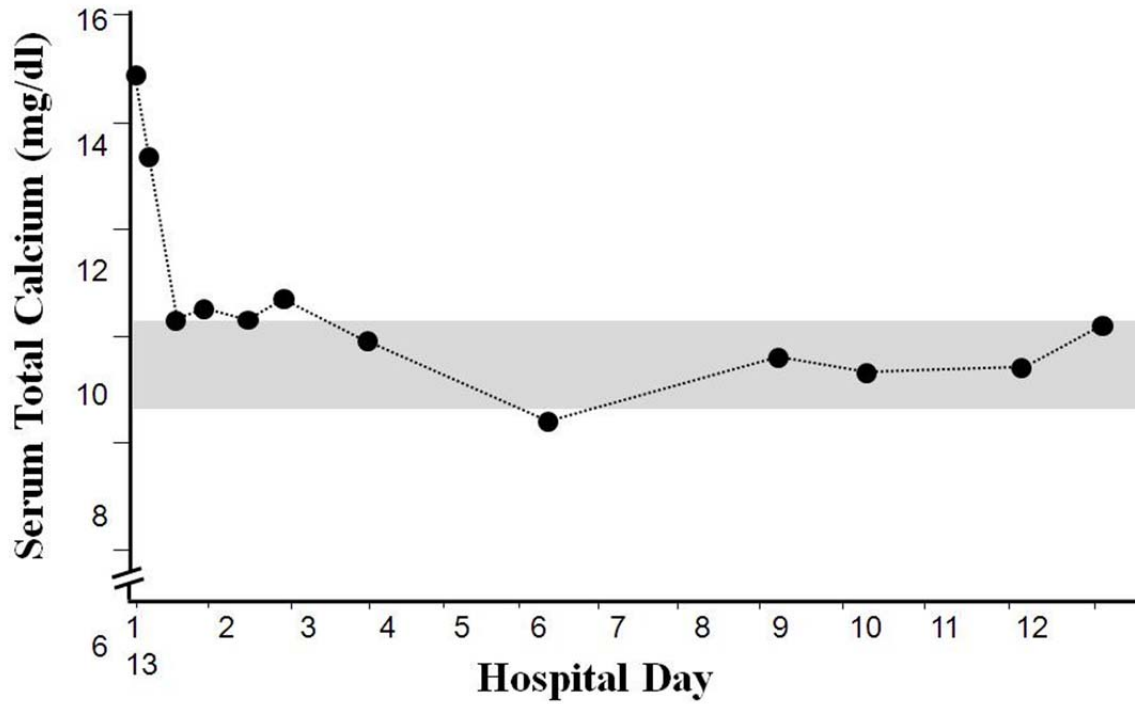

### **Immobilization Hypercalcemia**

Six hours after the fall and fractures, serum total calcium level was 14.9 mg/dl (shaded rectangle = reference range). Hemodialysis using a low calcium bath over the subsequent week rapidly corrected the hypercalcemia.

**Supplemental Table 1.**

**Lifelong Hypophosphatasemia In Hypophosphatasia  
Despite Chronic Renal Failure and Acute Fractures\***

| <b>Pt. Age (yrs)</b> | <b>Serum Alkaline Phosphatase</b> | <b>Serum Creatinine</b> |
|----------------------|-----------------------------------|-------------------------|
| 40                   | 16 ( 30 - 80 IU/L)                | 1.6 (0.8 - 1.3 mg/dl)   |
| "                    | 22 " " "                          | 1.4 " " "               |
| 42                   | 29 ( 45 - 115 IU/L)               | 1.4 (0.7 - 1.5 mg/dl)   |
| 53                   | 13 ( 18 - 94 IU/L)                | 2.8 " " "               |
| "                    | 12 " " "                          | 2.8 " " "               |
| "                    | 28 ( 38 - 126 IU/L)               | Peritoneal Dialysis     |
| 54                   | 38 " " "                          | Hemodialysis            |
| 55 <sup>†</sup>      | 36 " " "                          | " "                     |
| 57 <sup>#</sup>      | 18 " " "                          | " "                     |

\* Normal ranges given in parentheses.

† One day after traumatic fractures.

# At death
