# Supplementary material
Source: PubMed Central journal article supplement (PMC6287393)
Supplement: jc-13-1811.pdf [file jc-13-1811.pdf]

## Supplementary Figure

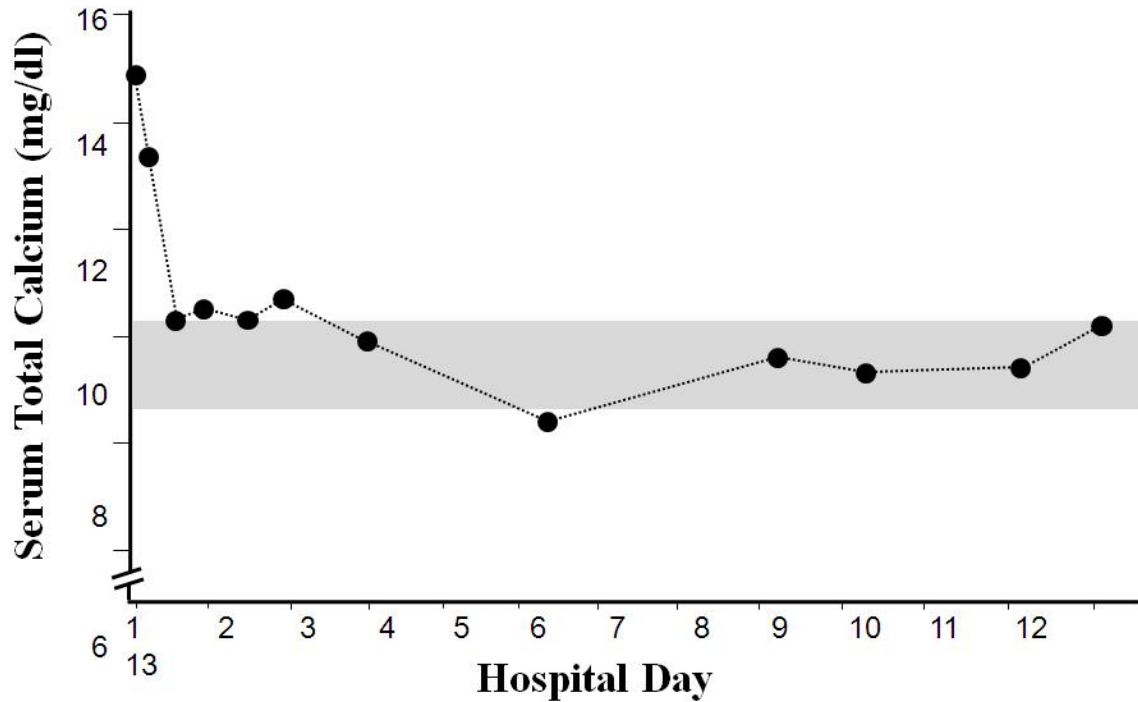

### Immobilization Hypercalcemia

Six hours after the fall and fractures, serum total calcium level was 14.9 mg/dl (shaded rectangle = reference range). Hemodialysis using a low calcium bath over the subsequent week rapidly corrected the hypercalcemia.

## Supplemental Table

### Lifelong Hypophosphatasemia In Hypophosphatasia Despite Chronic Renal Failure and Acute Fractures\*

| Pt. Age (yrs)   | Serum Alkaline Phosphatase | Serum Creatinine      |
|-----------------|----------------------------|-----------------------|
| 40              | 16 ( 30 - 80 IU/L)         | 1.6 (0.8 - 1.3 mg/dl) |
| "               | 22 " " "                   | 1.4 " " "             |
| 42              | 29 ( 45 - 115 IU/L)        | 1.4 (0.7 - 1.5 mg/dl) |
| 53              | 13 ( 18 - 94 IU/L)         | 2.8 " " "             |
| "               | 12 " " "                   | 2.8 " " "             |
| "               | 28 ( 38 - 126 IU/L)        | Peritoneal Dialysis   |
| 54              | 38 " " "                   | Hemodialysis          |
| 55 <sup>†</sup> | 36 " " "                   | " "                   |
| 57 <sup>#</sup> | 18 " " "                   | " "                   |

\* Normal ranges given in parentheses.

† One day after traumatic fractures.

# At death
